# Supplementary material
Source: Springer Nature journal article supplement (https://www.springermedizin.de/resource/supplementary/12955_2010_745_MOESM5_ESM.pdf/9560902)

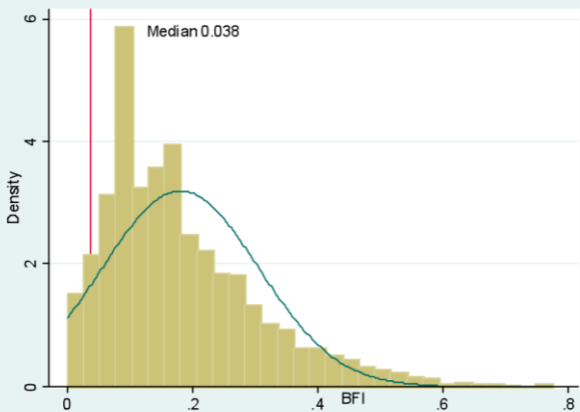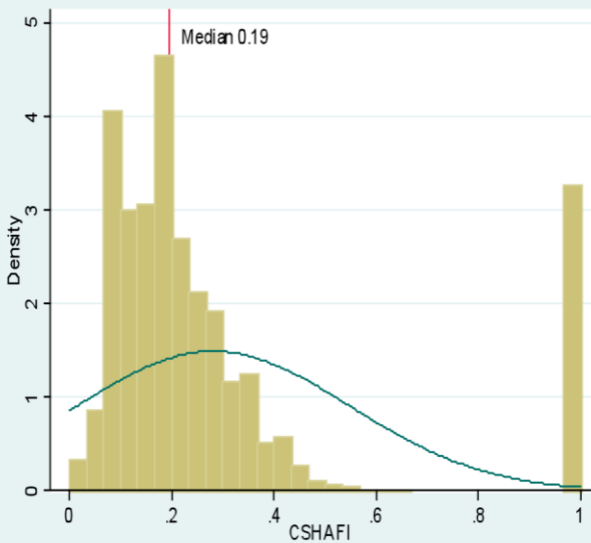

Supplement: MOESM5 [file 9560902]
